# Supplementary material for: Associations of Coffee, Diet Drinks, and Non-Nutritive Sweetener Use with Depression among Populations in Eastern Canada
Source: PubMed Central journal article supplement (PMC5524745; doi:10.1038/s41598-017-06529-w), 2017-07-24
Supplement: 41598_2017_6529_MOESM1_ESM.pdf [file 41598_2017_6529_MOESM1_ESM.pdf]

**Associations of Coffee, Diet Drinks, and Non-Nutritive Sweetener Use with  
Depression among Populations in Eastern Canada**

Zhijie M Yu<sup>1</sup>, Louise Parker<sup>1</sup>, Trevor J B Dummer<sup>2</sup>

<sup>1</sup> Population Cancer Research Program and Department of Pediatrics, Dalhousie University,  
Halifax, NS, Canada, B3H 4R2

<sup>2</sup> Centre of Excellence in Cancer Prevention, School of Prevention and Public Health,  
University of British Columbia, Vancouver, BC, Canada, V6T 1Z3

**Supplemental Table 1. Characteristics of participants according to total coffee consumption\***

| Characteristics                             | Total coffee consumption, cups/day |                        |                   | P value |
|---------------------------------------------|------------------------------------|------------------------|-------------------|---------|
|                                             | Never<br>(n = 7081)                | > 0-< 4<br>(n = 10052) | ≥ 4<br>(n = 1705) |         |
| <b>Age, yr</b>                              | 52.8 (9.1)                         | 52.9 (9.0)             | 52.8 (8.7)        | 0.75    |
| <b>Sex, n (%)</b>                           |                                    |                        |                   |         |
| Men                                         | 1838 (26.0)                        | 3196 (31.8)            | 820 (48.1)        | <0.001  |
| Women                                       | 5243 (74.0)                        | 6856 (68.2)            | 885 (51.9)        |         |
| <b>NNS in coffee or tea, n (%)</b>          |                                    |                        |                   |         |
| Never                                       | 6594 (93.1)                        | 8441 (84.0)            | 1466 (86.0)       | <0.001  |
| Some-times                                  | 150 (2.1)                          | 538 (5.4)              | 69 (4.1)          |         |
| Always                                      | 337 (4.8)                          | 1073 (10.7)            | 170 (10.0)        |         |
| <b>Diet drinks, n (%)</b>                   |                                    |                        |                   |         |
| Never                                       | 4677 (66.1)                        | 5827 (58.0)            | 993 (58.2)        | <0.001  |
| < 1 time/week                               | 1341 (18.9)                        | 2647 (26.3)            | 438 (25.7)        |         |
| 1-6 times/week                              | 594 (8.4)                          | 1150 (11.4)            | 184 (10.8)        |         |
| ≥ 1 times/day                               | 469 (6.6)                          | 428 (4.3)              | 90 (5.3)          |         |
| <b>NNS in coffee, tea, or drinks, n (%)</b> |                                    |                        |                   |         |
| Never                                       | 4468 (63.1)                        | 5146 (51.2)            | 879 (51.6)        | <0.001  |
| Either                                      | 2335 (33.0)                        | 3976 (39.6)            | 701 (41.1)        |         |
| Both                                        | 278 (3.9)                          | 930 (9.3)              | 125 (7.3)         |         |
| <b>Major depression<sup>†</sup>, n (%)</b>  | 1248 (17.6)                        | 1619 (16.1)            | 350 (20.5)        | <0.001  |
| <b>Province of residence, n (%)</b>         |                                    |                        |                   |         |
| Nova Scotia                                 | 4706 (66.5)                        | 6030 (60.0)            | 1009 (59.2)       | <0.001  |
| New Brunswick                               | 1368 (19.3)                        | 2642 (26.3)            | 433 (25.4)        |         |
| Newfoundland and Labrador                   | 894 (12.6)                         | 1176 (11.7)            | 226 (13.3)        |         |
| Prince Edward Island                        | 113 (1.6)                          | 204 (2.0)              | 37 (2.2)          |         |
| <b>Ethnicity, n (%)</b>                     |                                    |                        |                   |         |
| White                                       | 5518 (77.9)                        | 8836 (87.9)            | 1504 (88.2)       | <0.001  |
| Non-white                                   | 354 (5.0)                          | 585 (5.8)              | 103 (6.0)         |         |
| DNK/PNA                                     | 1209 (17.1)                        | 631 (6.3)              | 98 (5.8)          |         |
| <b>Education, n (%)</b>                     |                                    |                        |                   |         |
| Less than high school                       | 1227 (17.3)                        | 1813 (18.0)            | 352 (20.7)        | <0.001  |
| College level                               | 2594 (36.6)                        | 4006 (39.9)            | 686 (40.2)        |         |
| University level or higher                  | 2430 (34.3)                        | 4199 (41.8)            | 657 (38.5)        |         |
| DNK/PNA                                     | 830 (11.7)                         | 34 (0.3)               | 10 (0.6)          |         |
| <b>Smoking status, n (%)</b>                |                                    |                        |                   |         |
| Never smoker                                | 3816 (53.9)                        | 4718 (46.9)            | 592 (34.7)        |         |

|                                                  |      |             |      |             |      |             |        |
|--------------------------------------------------|------|-------------|------|-------------|------|-------------|--------|
| Former smoker                                    | 1999 | (28.2)      | 4296 | (42.7)      | 750  | (44.0)      | <0.001 |
| Current smoker                                   | 403  | (5.7)       | 967  | (9.6)       | 353  | (20.7)      |        |
| DNK/PNA                                          | 863  | (12.2)      | 71   | (0.7)       | 10   | (0.6)       |        |
| <b>Alcohol use, n (%)</b>                        |      |             |      |             |      |             |        |
| Abstainer                                        | 1039 | (14.7)      | 727  | (7.2)       | 175  | (10.3)      |        |
| Occasional drinker                               | 3068 | (43.3)      | 3695 | (36.8)      | 658  | (38.6)      |        |
| Regular drinker                                  | 1546 | (21.8)      | 3589 | (35.7)      | 525  | (30.8)      | <0.001 |
| Habitual drinker                                 | 584  | (8.3)       | 1989 | (19.8)      | 335  | (19.7)      |        |
| DNK/PNA                                          | 844  | (11.9)      | 52   | (0.5)       | 12   | (0.7)       |        |
| <b>Cardiovascular disease<sup>‡</sup>, n (%)</b> | 235  | (3.3)       | 286  | (2.9)       | 65   | (3.8)       | 0.046  |
| <b>Diabetes mellitus<sup>§</sup>, n (%)</b>      | 600  | (8.5)       | 697  | (6.9)       | 132  | (7.7)       | <0.001 |
| <b>Body mass index, kg/m<sup>2</sup></b>         | 28.5 | (6.0)       | 28.2 | (5.3)       | 29.0 | (5.5)       | <0.001 |
| <b>Total physical activity, MET-min/week</b>     | 2079 | (792, 4638) | 2220 | (904, 4843) | 2656 | (960, 5838) | <0.001 |
| <b>Healthy eating index</b>                      | 34.3 | (14.9)      | 40.0 | (7.9)       | 38.9 | (8.2)       | <0.001 |

DNK/PNA = do not know/prefer not to answer; NNS = non-nutritive sweetener.

\*Data are means (standard deviation), number of participants (percentage), or median (interquartile range). Percentages may not total 100 due to rounding. The numbers of participants vary slightly among different variables.

†Defined as a PHQ-9 score  $\geq 10$  and/or current use of antidepressant.

‡Self-reported coronary heart disease and/or stroke.

§Self-reported diabetes mellitus.

**Supplemental Table 2. Characteristics of participants according to non-nutritive sweeteners use\***

| Characteristics                            | NNS use              |                                    |                                  | P value |
|--------------------------------------------|----------------------|------------------------------------|----------------------------------|---------|
|                                            | Never<br>(n = 10493) | Either <sup>  </sup><br>(n = 7012) | Both <sup>  </sup><br>(n = 1333) |         |
| <b>Age, yr</b>                             | 53.0 (9.1)           | 52.9 (8.9)                         | 52.1 (9.2)                       | 0.002   |
| <b>Sex, n (%)</b>                          |                      |                                    |                                  |         |
| Men                                        | 3416 (32.6)          | 2072 (29.6)                        | 366 (27.5)                       | <0.001  |
| Women                                      | 7077 (67.4)          | 4940 (70.5)                        | 967 (72.5)                       |         |
| <b>Regular coffee, n (%)</b>               |                      |                                    |                                  |         |
| Never                                      | 4963 (47.3)          | 2797 (39.9)                        | 400 (30.0)                       | <0.001  |
| > 0- < 4 cups/day                          | 4776 (45.5)          | 3629 (51.8)                        | 835 (62.6)                       |         |
| ≥ 4 cups/day                               | 754 (7.2)            | 586 (8.4)                          | 98 (7.4)                         |         |
| <b>Decaffeinated coffee, n (%)</b>         |                      |                                    |                                  |         |
| Never                                      | 9639 (91.9)          | 6213 (88.6)                        | 1152 (86.4)                      | <0.001  |
| > 0- < 2 cups/day                          | 524 (5.0)            | 473 (6.8)                          | 100 (7.5)                        |         |
| ≥ 2 cups/day                               | 330 (3.1)            | 326 (4.7)                          | 81 (6.1)                         |         |
| <b>Total coffee, n (%)</b>                 |                      |                                    |                                  |         |
| Never                                      | 4468 (42.6)          | 2335 (33.3)                        | 278 (20.9)                       | <0.001  |
| > 0- < 4 cups/day                          | 5146 (49.0)          | 3976 (56.7)                        | 930 (69.8)                       |         |
| ≥ 4 cups/day                               | 879 (8.4)            | 701 (10.0)                         | 125 (9.4)                        |         |
| <b>Major depression<sup>†</sup>, n (%)</b> | 1633 (15.6)          | 1271 (18.1)                        | 313 (23.5)                       | <0.001  |
| <b>Province of residence, n (%)</b>        |                      |                                    |                                  |         |
| Nova Scotia                                | 6546 (62.4)          | 4400 (62.8)                        | 799 (59.9)                       | <0.001  |
| New Brunswick                              | 2586 (24.7)          | 1578 (22.5)                        | 279 (20.9)                       |         |
| Newfoundland and Labrador                  | 1150 (11.0)          | 904 (12.9)                         | 242 (18.2)                       |         |
| Prince Edward Island                       | 211 (2.0)            | 130 (1.9)                          | 13 (1.0)                         |         |
| <b>Ethnicity, n (%)</b>                    |                      |                                    |                                  |         |
| White                                      | 8513 (81.1)          | 6199 (88.4)                        | 1146 (86.0)                      | <0.001  |
| Non-white                                  | 554 (5.3)            | 392 (5.6)                          | 96 (7.2)                         |         |
| DNK/PNA                                    | 1426 (13.6)          | 421 (6.0)                          | 91 (6.8)                         |         |
| <b>Education, n (%)</b>                    |                      |                                    |                                  |         |
| Less than high school                      | 1830 (17.4)          | 1287 (18.4)                        | 275 (20.6)                       | <0.001  |
| College level                              | 3847 (36.7)          | 2849 (40.6)                        | 590 (44.3)                       |         |
| University level or higher                 | 3973 (37.9)          | 2851 (40.7)                        | 462 (34.7)                       |         |
| DNK/PNA                                    | 843 (8.0)            | 25 (0.4)                           | 6 (0.5)                          |         |
| <b>Smoking status, n (%)</b>               |                      |                                    |                                  |         |
| Never smoker                               | 5041 (48.0)          | 3516 (50.1)                        | 569 (42.7)                       | <0.001  |
| Former smoker                              | 3632 (34.6)          | 2815 (40.2)                        | 598 (44.9)                       |         |

|                                                  |      |             |      |             |      |             |        |
|--------------------------------------------------|------|-------------|------|-------------|------|-------------|--------|
| Current smoker                                   | 940  | (9.0)       | 630  | (9.0)       | 153  | (11.5)      |        |
| DNK/PNA                                          | 880  | (8.4)       | 51   | (0.7)       | 13   | (1.0)       |        |
| <b>Alcohol use, n (%)</b>                        |      |             |      |             |      |             |        |
| Abstainer                                        | 1073 | (10.2)      | 726  | (10.4)      | 142  | (10.7)      |        |
| Occasional drinker                               | 3806 | (36.3)      | 2966 | (42.3)      | 649  | (48.7)      |        |
| Regular drinker                                  | 2975 | (28.4)      | 2296 | (32.7)      | 389  | (29.2)      | <0.001 |
| Habitual drinker                                 | 1780 | (17.0)      | 984  | (14.0)      | 144  | (10.8)      |        |
| DNK/PNA                                          | 859  | (8.2)       | 40   | (0.6)       | 9    | (0.7)       |        |
| <b>Cardiovascular disease<sup>‡</sup>, n (%)</b> | 299  | (2.9)       | 233  | (3.3)       | 54   | (4.1)       | 0.026  |
| <b>Diabetes mellitus<sup>§</sup>, n (%)</b>      | 569  | (5.4)       | 640  | (9.1)       | 220  | (16.5)      | <0.001 |
| <b>Body mass index, kg/m<sup>2</sup></b>         | 27.6 | (5.3)       | 29.2 | (5.7)       | 30.3 | (6.1)       | <0.001 |
| <b>Total physical activity, MET-min/week</b>     | 2239 | (891, 4989) | 2151 | (843, 4579) | 2306 | (815, 5357) | 0.002  |
| <b>Healthy eating index</b>                      | 36.2 | (13.4)      | 39.6 | (7.9)       | 39.8 | (7.9)       | <0.001 |

DNK/PNA = do not know/prefer not to answer; NNS = non-nutritive sweetener.

\*Data are means (standard deviation), number of participants (percentage), or median (interquartile range). Percentages may not total 100 due to rounding. The numbers of participants vary slightly among different variables.

<sup>†</sup>Defined as a PHQ-9 score  $\geq 10$  and/or current use of antidepressant.

<sup>‡</sup>Self-reported coronary heart disease and/or stroke.

<sup>§</sup>Self-reported diabetes mellitus.

<sup>||</sup>Either added non-nutritive sweetener in coffee or tea or drank diet drinks.

<sup>¶</sup>Both added non-nutritive sweetener in coffee or tea and drank diet drinks.
